# Supplementary material for: Arming of MAIT Cell Cytolytic Antimicrobial Activity Is Induced by IL-7 and Defective in HIV-1 Infection
Source: PubMed Central journal article supplement (PMC4546682; doi:10.1371/journal.ppat.1005072), 2015-08-21
Supplement: ppat.1005072.s001.pdf [file ppat.1005072.s001.pdf]

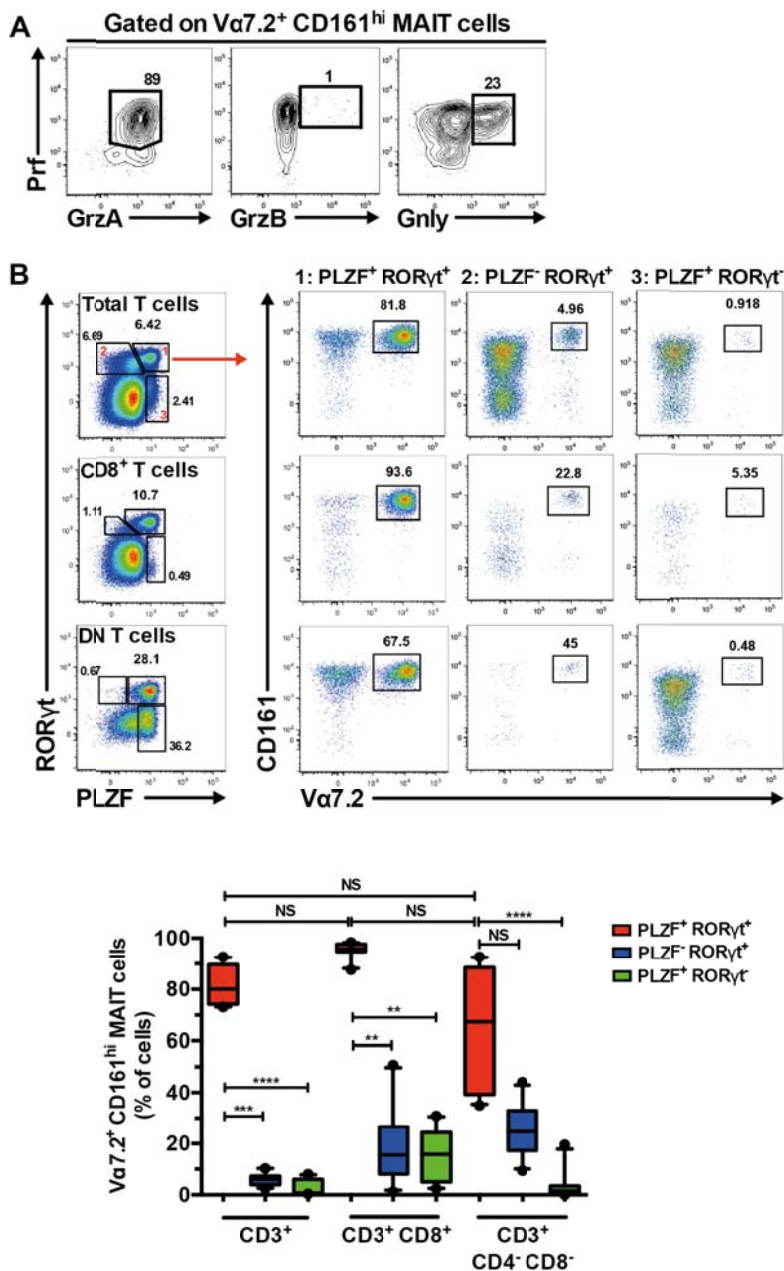

**S1 Fig. Cytolytic protein and transcription factor expression profiles in MAIT cells.** (A) Most of MAIT cell cytolitic proteins expressed at steady state are co-expressed with perforin (Prf). FACS plots representative of data from 20 healthy individuals are shown. (B) PLZF and ROR $\gamma$ t co-expression in the CD8<sup>+</sup> T cell population sufficiently identifies the MAIT cell population. Freshly isolated PBMCs from 10 healthy individuals were stained for the transcription factors PLZF and ROR $\gamma$ t. The co-expression patterns for these transcription factors, PLZF<sup>+</sup> ROR $\gamma$ t<sup>+</sup> (gate no. 1), PLZF<sup>-</sup> ROR $\gamma$ t<sup>+</sup> (gate no. 2), PLZF<sup>+</sup> ROR $\gamma$ t<sup>-</sup> (gate no. 3) were determined in total T cells, CD8<sup>+</sup> T cells, and CD4<sup>-</sup> CD8<sup>-</sup> double-negative (DN) T cells. MAIT cells were identified from these sub-populations by their  $V\alpha 7.2$  TCR and high levels of CD161 co-expression. Box and whisker plot shows median, IQR and the 10<sup>th</sup> to the 90<sup>th</sup> percentile. Significance across multiple paired samples was determined by the Friedman test followed by Dunn's post-hoc test. Representative FACS plots from a single individual are shown.
