# Supplementary material for: Arming of MAIT Cell Cytolytic Antimicrobial Activity Is Induced by IL-7 and Defective in HIV-1 Infection
Source: PubMed Central journal article supplement (PMC4546682; doi:10.1371/journal.ppat.1005072), 2015-08-21
Supplement: ppat.1005072.s002.pdf [file ppat.1005072.s002.pdf]

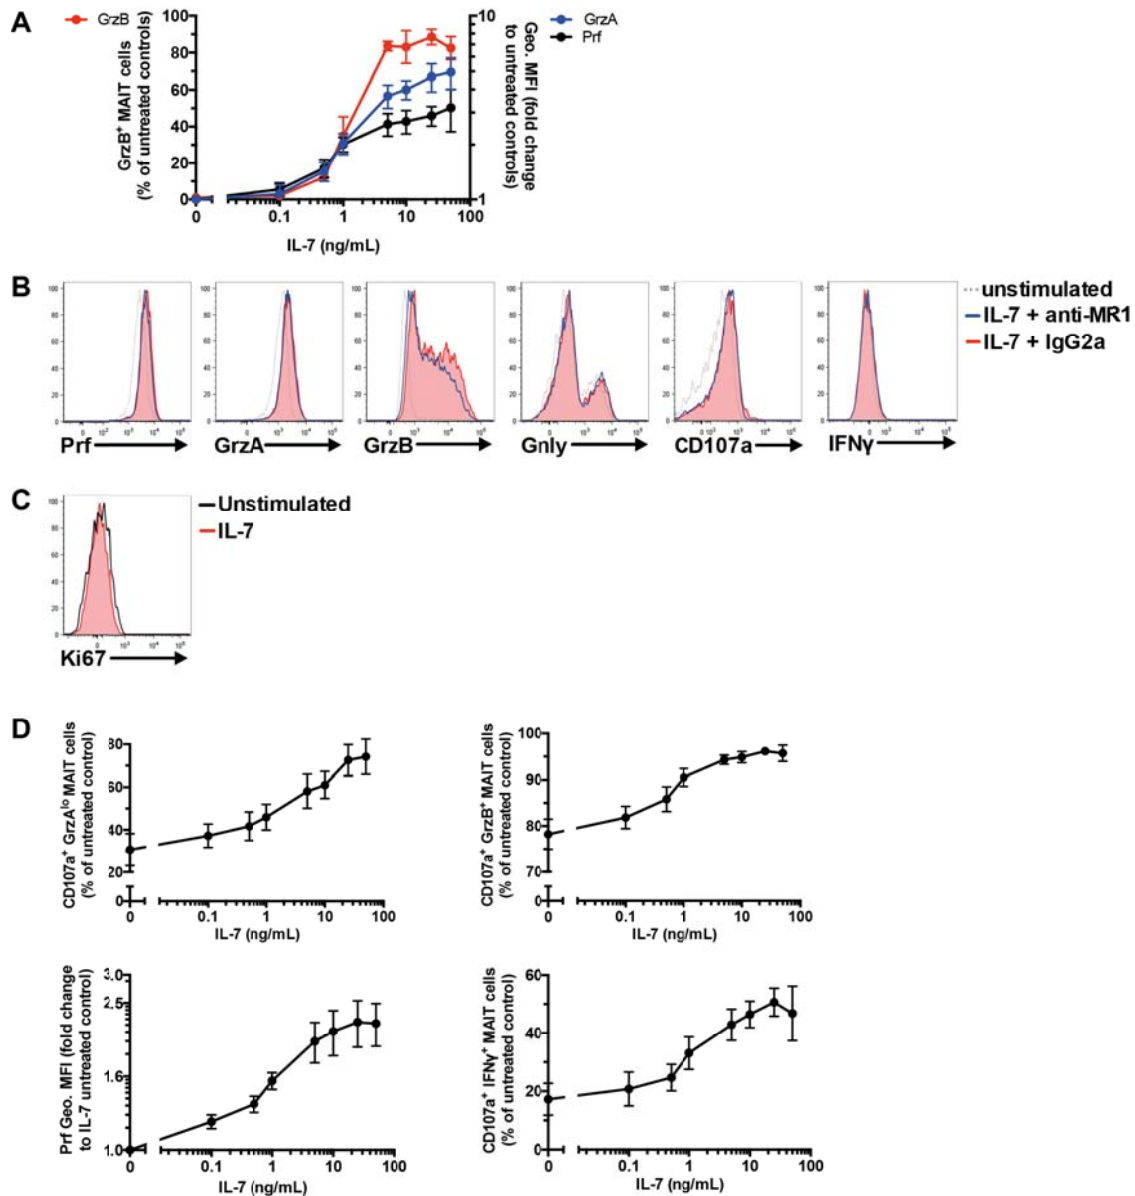

**S2 Fig. Dose-response curve and MR1-independency of IL-7 arming of MAIT cell cytotoxicity.** Freshly isolated PBMCs from three healthy donors were incubated with a range of IL-7 concentrations as indicated or left untreated for 24 h. Cells were then cultured for another 24 h in the absence (A, B, C), or presence of PFA-fixed *E. coli* (MOI 10) (D), before staining for cytolytic proteins and IFN $\gamma$ . (B) To determine the MR1-dependency of IL-7 arming of MAIT cell cytotoxicity, freshly isolated PBMCs were incubated with 10 ng/ml IL-7 in the presence of anti-MR1 or IgG2a isotype control for 24 h. Cells were then harvested and stained for cytolytic proteins and IFN $\gamma$ . Representative FACS plots from two independent donors are shown. Error bars represent mean and standard deviation.
