# Supplementary material for: Arming of MAIT Cell Cytolytic Antimicrobial Activity Is Induced by IL-7 and Defective in HIV-1 Infection
Source: PubMed Central journal article supplement (PMC4546682; doi:10.1371/journal.ppat.1005072), 2015-08-21
Supplement: ppat.1005072.s003.pdf [file ppat.1005072.s003.pdf]

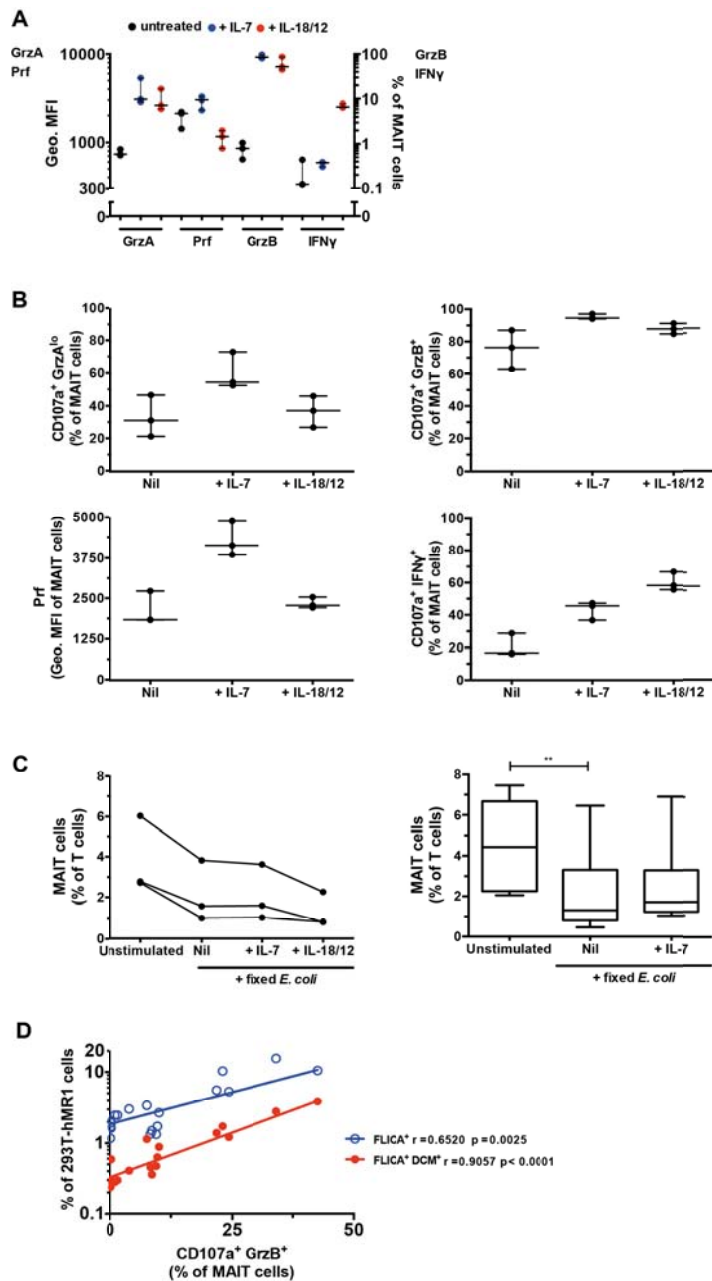

**S3 Fig. Arming of MAIT cell cytotoxicity by IL-7 compared to activation by IL-12 and IL-18.** (A) Freshly isolated PBMCs from three healthy donors were incubated with 10 ng/ml of IL-7, a combination of IL-12 and IL-18 (10 ng/ml and 100 ng/ml, respectively), or left untreated for 48 h. Cells were further cultured for the next 24 h in the absence or presence of PFA-fixed *E. coli* stimulation (MOI 10) (A and B, respectively) before staining for MAIT cell cytolytic proteins and IFN $\gamma$ . (C) MAIT cell frequency following *E. coli* stimulation in the presence or absence of IL-7, or in a combination of IL-12 and IL-18, was determined in three healthy individuals (left panel) or in eight healthy individuals (right panel). The Friedman test followed by Dunn's post-hoc test was used to determine significance across multiple, paired samples. Error bars represent median and IQR, and box and whisker plot shows median, IQR and the 10<sup>th</sup> to the 90<sup>th</sup> percentile. (D) Spearman rank correlation between the capacity of healthy donor ( $n=18$ ) MAIT cells to upregulate GrzB and degranulate following a 24 h co-culture with *E. coli*-pulsed 293T-hMR1 cells, and the 293T-hMR1 cell death.
