# Supplementary material for: Arming of MAIT Cell Cytolytic Antimicrobial Activity Is Induced by IL-7 and Defective in HIV-1 Infection
Source: PubMed Central journal article supplement (PMC4546682; doi:10.1371/journal.ppat.1005072), 2015-08-21
Supplement: ppat.1005072.s004.pdf [file ppat.1005072.s004.pdf]

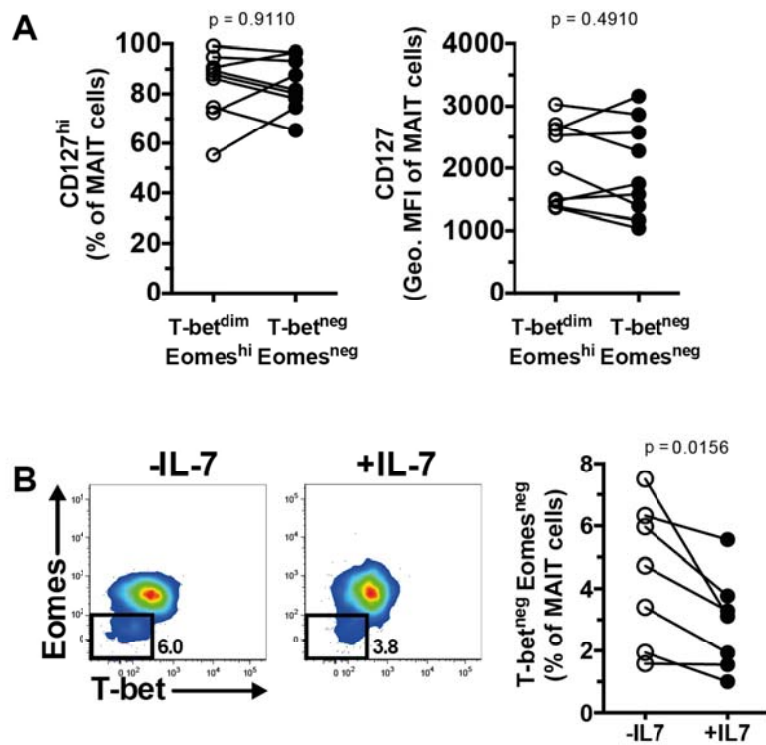

**S4 Fig. The influence of a short-course IL-7 treatment *in vitro* on T-bet<sup>neg</sup> Eomes<sup>neg</sup> MAIT cell levels.** (A) The levels of CD127 expression in T-bet<sup>dim</sup> Eomes<sup>hi</sup> and T-bet<sup>neg</sup> Eomes<sup>neg</sup> MAIT cells from nine HIV-1 infected ART-untreated patients. (B) PBMCs from seven healthy controls were incubated with 10 ng/ml of IL-7 for 48 h and then stained for transcription factor expression as described in Figure 6. Significance was determined using the paired t-test.
