# Supplementary material for: Arming of MAIT Cell Cytolytic Antimicrobial Activity Is Induced by IL-7 and Defective in HIV-1 Infection
Source: PubMed Central journal article supplement (PMC4546682; doi:10.1371/journal.ppat.1005072), 2015-08-21
Supplement: ppat.1005072.s005.pdf [file ppat.1005072.s005.pdf]

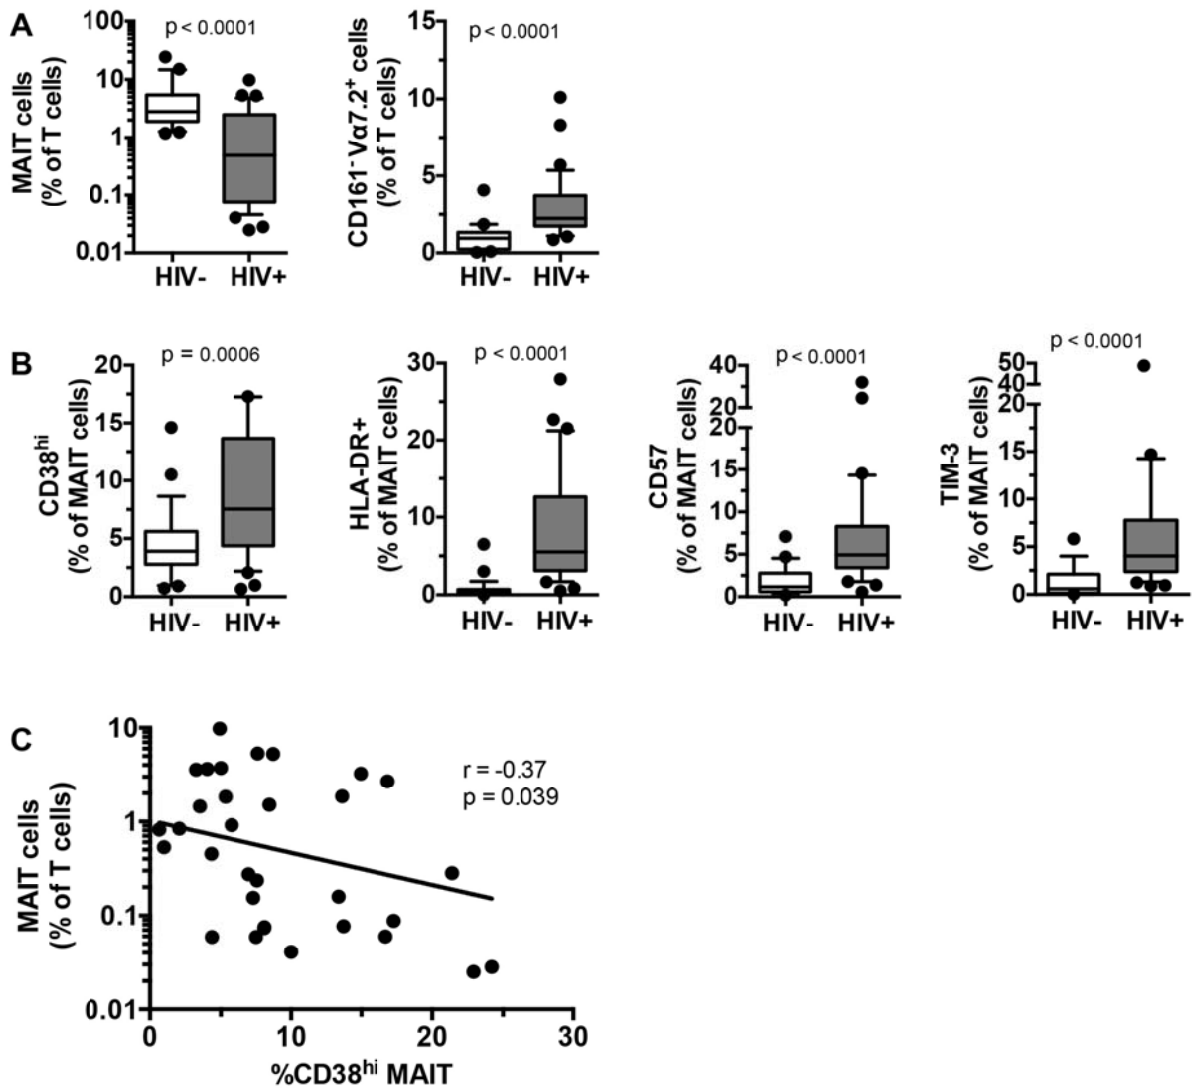

**S5 Fig. MAIT cell depletion in chronically HIV-1 infected patient cohort 2 is associated with activation and exhaustion phenotypes, as previously observed for cohort 1.** (A) The frequency of MAIT cells and Va7.2<sup>+</sup> CD161<sup>-</sup> T cells from 20 healthy controls and 31 untreated HIV-infected patients. (B) The expression of CD38, HLA-DR, CD57, and TIM-3 was then determined on the MAIT cell population from these individuals. Significance was determined using the Mann-Whitney test. Box and whisker plots show median, IQR and the 10<sup>th</sup> to the 90<sup>th</sup> percentile. (C) Spearman's rank correlation between CD38<sup>hi</sup>-expressing MAIT cells and the frequency of MAIT cells in the peripheral blood of 31 untreated HIV-infected patients.
