# Supplementary material for: Arming of MAIT Cell Cytolytic Antimicrobial Activity Is Induced by IL-7 and Defective in HIV-1 Infection
Source: PubMed Central journal article supplement (PMC4546682; doi:10.1371/journal.ppat.1005072), 2015-08-21
Supplement: ppat.1005072.s006.pdf [file ppat.1005072.s006.pdf]

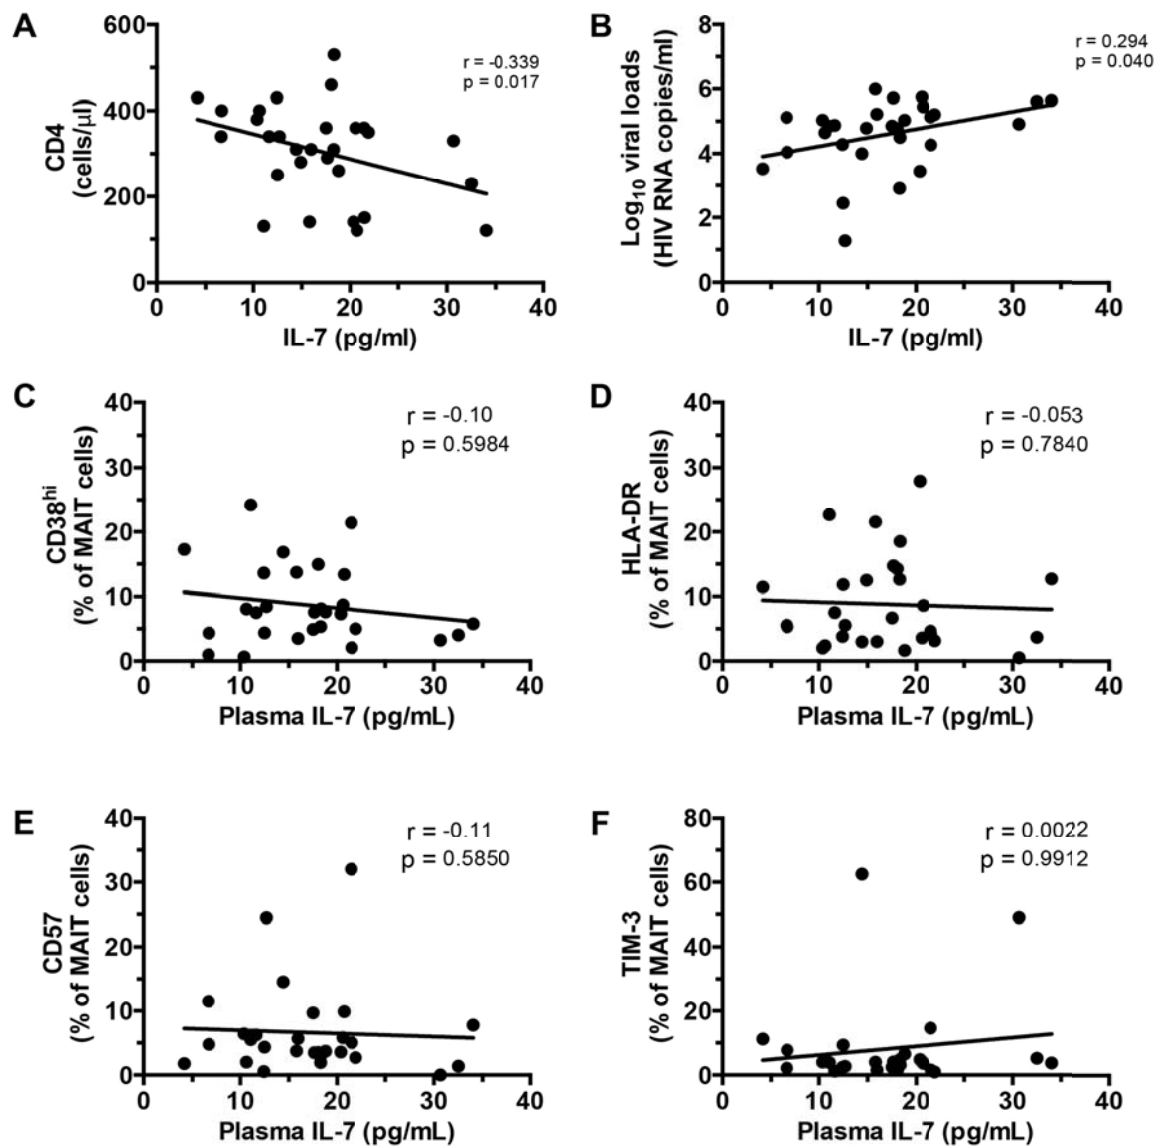

**S6 Fig. Plasma IL-7 levels weakly correlate with CD4 counts and plasma viral load, but not with MAIT cell activation markers.** Relationships between plasma IL-7 levels and CD4 counts (A), plasma viral loads (B), as well as with the MAIT cell activation markers CD38 (C), HLA-DR (D), CD57 (E), and TIM-3 (F) was assessed using Spearman's rank correlation in 31 ART-untreated HIV-infected patients.
